# Supplementary material
Source: PubMed Central journal article supplement (PMC4994774)
Supplement: BJP638700_-_Appendices.pdf [file BJP638700_-_Appendices.pdf]

# Appendix 1

## Search terms

‘Chronic pain’, ‘pain’, specific chronic pain conditions including ‘fibromyalgia’ or ‘chronic fatigue syndrome’ or ‘chronic low back pain’ or ‘whiplash associated disorder’ or ‘WAD’ or ‘repetitive strain injury’ or ‘RSI’ or ‘dystrophy back pain’, ‘migraine’, ‘headache’, ‘arthritis’, ‘migraine’, ‘headache’, ‘osteoarthritis’, ‘rheumatoid arthritis’, ‘myofascial pain’, ‘neuralgia’, ‘abdominal pain’, ‘abdominal recurrent pain’, ‘musculoskeletal pain’, ‘cancer pain’, ‘post operative pain’, ‘dysmenorrhea’ and ‘low back pain’.

## Appendix 2.

### Quality checklist

| <b>Checklist</b>                                                                                                                                      | <b>Name of app</b> |
|-------------------------------------------------------------------------------------------------------------------------------------------------------|--------------------|
| Specific to pain management                                                                                                                           |                    |
| Measures of subjective pain experiences via standardized assessment tools to assess any changes in symptoms (eg McGill pain questionnaire)            |                    |
| Use of a standardized measure of mood or affect (eg Beck’s Depression Inventory)                                                                      |                    |
| Use of a pain diary                                                                                                                                   |                    |
| Incorporation of activity pacing/physical activity                                                                                                    |                    |
| Guidelines for better sleep/insomnia                                                                                                                  |                    |
| Stress management & relaxation techniques (eg PMR, deep breathing exercises, autogenic training, imagery, yoga, mindfulness meditation, hypnosis etc) |                    |
| Fostering cognitive coping and appraisal (Coping strategies questionnaire and subscales, e.g. catastrophizing, passive coping, active coping)         |                    |
| Problem solving strategies                                                                                                                            |                    |
| Health eating                                                                                                                                         |                    |
| Incorporating a medication regime to alleviate pain                                                                                                   |                    |
| Dealing with symptoms of depression or with difficult emotions                                                                                        |                    |
| Psycho-education about pain and how it effects overall functioning                                                                                    |                    |
| Cognitive restructuring/ challenging automatic thoughts                                                                                               |                    |
| Encouraging social support                                                                                                                            |                    |
| Pleasant events scheduling                                                                                                                            |                    |
| Other (miscellaneous)                                                                                                                                 |                    |

|                                                                                            |  |
|--------------------------------------------------------------------------------------------|--|
| Advice from qualified health care professionals (GP's, psychologists or trained personnel) |  |
| App subject to control trial evaluation                                                    |  |
| Based on quality guidelines (NICE)                                                         |  |
| App based on quality guidelines or refers to credible evidence based literature/source     |  |

## Appendix 3

Table 1. App details and scores

| <b>App name</b>          | <b>App category</b>  | <b>Profession of app content developer</b>                            | <b>Score on quality checklist</b> | <b>Price</b> |
|--------------------------|----------------------|-----------------------------------------------------------------------|-----------------------------------|--------------|
| Web MD Pain Coach        | Health & Fitness     | Physician reviewed                                                    | 15                                | Free         |
| Back Pain relief         | Health & Fitness     | Profession unclear                                                    | 9                                 | Free         |
| Pain Tricks              | Medical              | Reviewed by pediatric medical professionals working within the NHS    | 9                                 | Free         |
| Habit Changer            | Health & Fitness     | Unclear although authors claim to be trained in CBT & behavior change | 14                                | 1.99 dollars |
| Fibromyalgia guide       | Health & Fitness     | Not specified                                                         | 5                                 | Free         |
| Living with fibromyalgia | Books and references | Landscape gardener                                                    | 7                                 | €5.86        |
